# Supplementary material for: Plant Growth, Antibiotic Uptake, and Prevalence of Antibiotic Resistance in an Endophytic System of Pakchoi under Antibiotic Exposure
Source: PubMed Central journal article supplement (PMC5707975; doi:10.3390/ijerph14111336), 2017-11-03
Supplement: ijerph-14-01336-s001.pdf [file ijerph-14-01336-s001.pdf]

## Supplementary Material

# Plant Growth, Antibiotic Uptake, and Prevalence of Antibiotic Resistance in an Endophytic System of Pakchoi under Antibiotic Exposure

Hao Zhang, Xunan Li, Qingxiang Yang, Linlin Sun, Xinxin Yang, Mingming Zhou, Rongzhen Deng, and Linqian Bi

### Table S1–S3

**Table S1.** PCR primers, annealing temperatures, and resistance mechanisms

**Table S2.** qPCR primers and annealing temperatures used in the present study

**Table S3.** qPCR standard curves for 16S rRNA gene and antibiotic resistance genes

**Table S4.** Root length, plant height, and fresh biomass values of hydroponic pakchoi under different dosages of antibiotic treatment

**Table S1.** PCR primers, annealing temperatures, and resistance mechanisms.

| <b>Gene name</b> | <b>Primer</b> | <b>5'-3' sequence</b>  | <b>Resistance Mechanism</b>  | <b>Anneal temp. (°C)</b> | <b>Reference</b> |
|------------------|---------------|------------------------|------------------------------|--------------------------|------------------|
| <i>tetA</i>      | FW            | GCTACATCCTGCTGCCTTC    | efflux pump                  | 55                       | [1]              |
|                  | RV            | CATAGATCGCCGTGAAGAGG   |                              |                          |                  |
| <i>tetC</i>      | FW            | CTTGAGAGCCTTCAACCCAG   | efflux pump                  | 55                       | [1]              |
|                  | RV            | ATGGTCGTCATCTACCTGCC   |                              |                          |                  |
| <i>tetG</i>      | FW            | GCTCGGTGGTATCTCTGCTC   | efflux pump                  | 55                       | [1]              |
|                  | RV            | AGCAACAGAATCGGGAACAC   |                              |                          |                  |
| <i>tetK</i>      | FW            | CGAAAACAGACTCGCCAATC   | efflux pump                  | 55                       | [1]              |
|                  | RV            | TCCATAATGAGGTGGGGC     |                              |                          |                  |
| <i>tetL</i>      | FW            | TCGTTAGCGTGCTGTCATTC   | efflux pump                  | 55                       | [1]              |
|                  | RV            | GTATCCCACCAATGTAGCCG   |                              |                          |                  |
| <i>tetM</i>      | FW            | ACAGAAAGCTTATTATATAAC  | ribosomal protection protein | 45                       | [2]              |
|                  | RV            | TGGCGTGTCTATGATGTTAC   |                              |                          |                  |
| <i>tetO</i>      | FW            | ACGGARAGTTTATTGTATACC  | ribosomal protection protein | 45                       | [2]              |
|                  | RV            | TGGCGTATCTATAATGTTGAC  |                              |                          |                  |
| <i>tetQ</i>      | FW            | AGAATCTGCTGTTTGCCAGTG  | ribosomal protection protein | 55                       | [2]              |
|                  | RV            | CGGAGTGTCAATGATATTGCA  |                              |                          |                  |
| <i>tetT</i>      | FW            | AAGGTTTATTATATAAAAGTG  | ribosomal protection protein | 45                       | [2]              |
|                  | RV            | AGGTGTATCTATGATATTTAC  |                              |                          |                  |
| <i>tetW</i>      | FW            | GAGAGCCTGCTATATGCCAG   | ribosomal protection protein | 55                       | [2]              |
|                  | RV            | GGCGTATCCACAATGTTAAC   |                              |                          |                  |
| <i>tetX</i>      | FW            | CAATAATTGGTGGTGACCC    | enzymatic modification       | 55                       | [1]              |
|                  | RV            | TICTTACCTGGACATCCCG    |                              |                          |                  |
| <i>tetB/P</i>    | FW            | AAAACCTTATTATATTATAGTG | ribosomal protection protein | 45                       | [3]              |

|                            |    |                                  |                              |    |     |
|----------------------------|----|----------------------------------|------------------------------|----|-----|
|                            | RV | TGGAGTATCAATAATATTCAC            |                              |    |     |
| <i>sul1</i>                | FW | CGGCGTGGGCTACCTGAACG             | ribosomal protection protein | 60 | [2] |
|                            | RV | GCCGATCGCGTGAAGTTCCG             |                              |    |     |
| <i>sul2</i>                | FW | GCGCTCAAGGCAGATGGCATT            | ribosomal protection protein | 60 | [4] |
|                            | RV | GCGTTTGATACCGGCACCCGT            |                              |    |     |
| <i>sul3</i>                | FW | TCAAAGCAAAATGATATGAGC            | ribosomal protection protein | 50 | [5] |
|                            | RV | TTTCAAGGCATCTGATAAAGAC           |                              |    |     |
| <i>dfrA1</i>               | FW | AGCATTACCCAACCGAAAAGT            | enzymatic modification       | 50 | [6] |
|                            | RV | TGTCAGCAAGATAGCCAGAT             |                              |    |     |
| <i>dfrA7</i>               | FW | AAATGGCGTAATCGGTAATG             | enzymatic modification       | 50 | [6] |
|                            | RV | GTGAACAGTAGACAAATGAAT            |                              |    |     |
| <i>bla<sub>ampC</sub></i>  | FW | TGGCGTATCGGGTCAATGT              | enzymatic modification       | 55 | [5] |
|                            | RV | CTCCACGGGCCAGTTGAG               |                              |    |     |
| <i>bla<sub>VIM</sub></i>   | FW | GCACTTCTCGCGGAGATTG              | enzymatic modification       | 55 | [5] |
|                            | RV | CGACGGTGATGCGTACGTT              |                              |    |     |
| <i>bla<sub>CTX-M</sub></i> | FW | ATGTGCAGYACCAGTAARGTKATGGC       | enzymatic modification       | 55 | [7] |
|                            | RV | ATCACKCGGRTCGCCNGGRAT            |                              |    |     |
| <i>bla<sub>TEM</sub></i>   | FW | TCGGGAAATGTGCG                   | enzymatic modification       | 50 | [7] |
|                            | RV | GGAATAAGGGCGACA                  |                              |    |     |
| <i>bla<sub>SHV</sub></i>   | FW | CTTTCCCATGATGAGCACCTTT           | enzymatic modification       | 55 | [5] |
|                            | RV | TCCTGCTGGCGATAGTGGAT             |                              |    |     |
| <i>bla<sub>Z</sub></i>     | FW | GGAGATAAAGTAACAAATCCAGTTAGATATGA | enzymatic modification       | 55 | [5] |
|                            | RV | TGCTTAATTTCCATTTGCGATAAG         |                              |    |     |

**Table S2.** qPCR primers and annealing temperatures used in the present study.

| Gene name                  | Primer | 5'-3' sequence        | Product size (bp) | Anneal temp. (°C) | Reference |
|----------------------------|--------|-----------------------|-------------------|-------------------|-----------|
| 16S rRNA                   | 338F   | CCTACGGGAGGCAGCAG     | 202               | 60                | [8]       |
|                            | 518R   | ATTACCGCGGCTGCTGG     |                   |                   |           |
| <i>tetX</i>                | FW     | AGCCITACCAATGGGTGTAAG | 278               | 60                | [9]       |
|                            | RV     | TTCCTACCTTGGACATCCCG  |                   |                   |           |
| <i>sul1</i>                | FW     | CCGTTGGCCTTCCTGTAAAG  | 67                | 60                | [10]      |
|                            | RV     | TTGCCGATCGCGTGAAGT    |                   |                   |           |
| <i>sul2</i>                | FW     | CTCCGATGGAGGCCGGTAT   | 190               | 60                | [10]      |
|                            | RV     | GGGAATGCCATCTGCCTTGA  |                   |                   |           |
| <i>bla<sub>CTX-M</sub></i> | FW     | GGAGGCGTGACGGCTTTT    | 101               | 51                | [5]       |
|                            | RV     | TTCAGTCCGATCCAGACGAA  |                   |                   |           |

**Table S3.** qPCR standard curves for 16S rRNA gene and antibiotic resistance genes.

| Gene name                  | Standard curves                             | R <sup>2</sup> |
|----------------------------|---------------------------------------------|----------------|
| 16S rRNA                   | $Y = -3.407 \times \text{Log}(X) + 36.004$  | 0.99497        |
| <i>tetX</i>                | $Y = -3.0462 \times \text{Log}(X) + 34.639$ | 0.99532        |
| <i>sul1</i>                | $Y = -2.9326 \times \text{Log}(X) + 34.148$ | 0.99082        |
| <i>sul2</i>                | $Y = -3.425 \times \text{Log}(X) + 36.19$   | 0.99686        |
| <i>bla<sub>CTX-M</sub></i> | $Y = -2.7213 \times \text{Log}(X) + 33.879$ | 0.99391        |

**Table S4.** Root length, plant height, and fresh biomass values of hydroponic pakchoi under different dosages of antibiotic treatment.

| Antibiotic concentration (mg L <sup>-1</sup> ) | Root length        |                     | Plant height       |                     | Fresh biomass     |                     |
|------------------------------------------------|--------------------|---------------------|--------------------|---------------------|-------------------|---------------------|
|                                                | average value (cm) | inhibition rate (%) | average value (cm) | inhibition rate (%) | average value (g) | inhibition rate (%) |
| <b>TC treatment</b>                            |                    |                     |                    |                     |                   |                     |
| 0                                              | 19.8 ± 3.12 b*     |                     | 12.45 ± 1.14 b     |                     | 10.72 ± 2.46 b    |                     |
| 50%MIC                                         | 22.8 ± 2.44 a      | -15.15              | 13.85 ± 1.06 a     | -11.24              | 20.75 ± 3.09 a    | -93.53              |
| MIC                                            | 15.6 ± 1.51 c      | 21.21               | 10.8 ± 1.23 c      | 13.25               | 8.01 ± 1.99 c     | 25.31               |
| <b>CPL treatments</b>                          |                    |                     |                    |                     |                   |                     |
| 0                                              | 19.8 ± 3.12 b      |                     | 12.45 ± 1.14 bc    |                     | 10.72 ± 2.46 b    |                     |
| 50%MIC                                         | 25.6 ± 2.79 a      | -29.29              | 14.5 ± 2.07 a      | -16.47              | 15.06 ± 2.90 a    | -40.44              |
| MIC                                            | 24.5 ± 3.24 a      | -23.73              | 13.1 ± 1.29 b      | -5.22               | 12.97 ± 1.87 a    | -20.99              |
| <b>SMX treatments</b>                          |                    |                     |                    |                     |                   |                     |
| 0                                              | 19.8 ± 3.12 a      |                     | 12.45 ± 1.14 b     |                     | 10.72 ± 2.46 b    |                     |
| 50%MIC                                         | 20.3 ± 0.95 a      | -2.53               | 13.95 ± 1.17 a     | -12.05              | 12.73 ± 1.47 a    | -18.72              |
| MIC                                            | 12.05 ± 2.52 b     | 39.14               | 11.15 ± 1.20 c     | 10.44               | 6.51 ± 1.53 c     | 39.28               |

The values are mean ± SD (*n* = 10). \* Different letters indicate the differences in the value among the treatments based on the LSD (Least Significant Difference) test (*P* < 0.05)

Commented [Edit1]: Consider defining.

## References

1. Ng, L.K.; Martin, I.; Alfa, M.; Mulvey, M. Multiplex PCR for the detection of tetracycline resistant genes. *Mol. Cell Probes* **2001**, *15*, 209–215.
2. Aminov, R.I.; Garrigues-Jeanjean, N.; Mackie, R.I. Molecular ecology of tetracycline resistance: development and validation of primers for detection of tetracycline resistance genes encoding ribosomal protection proteins. *Appl. Environ. Microbiol.* **2001**, *67*, 22–32.
3. Mu, Q.; Li, J.; Sun, Y.; Mao, D.; Wang, Q.; Yi, L. Occurrence of sulfonamide-, tetracycline-, plasmid-mediated quinolone- and macrolide-resistance genes in livestock feedlots in northern China. *Environ. Sci. Pollut. Res.* **2015**, *22*, 6932–6940.
4. Kern, M.B.; Klemmensen, T.; Frimodt-Møller, N.; Espersen, F. Susceptibility of danish *Escherichia coli* strains isolated from urinary tract infections and bacteraemia, and distribution of *sul* genes conferring sulphonamide resistance. *J. Antimicrob. Chemother.* **2002**, *50*, 513–516.
5. Zhu, Y.G.; Johnson, T.A.; Su, J.Q.; Qiao, M.; Guo, G.X.; Stedtfeld, R.D.; Hashsham, S.A.; Tiedje, J.M. Diverse and abundant antibiotic resistance genes in Chinese swine farms. *Proc. Natl. Acad. Sci. USA* **2013**, *110*, 3435–3440.
6. Selvam, A.; Xu, D.L.; Zhao, Z.Y.; Wong, J.W.C. Fate of tetracycline, sulfonamide and fluoroquinolone resistance genes and the changes in bacterial diversity during composting of swine manure. *Bioresour. Technol.* **2012**, *126*, 383–390.
7. Knapp, C.W.; Zhang, W.; Sturm, B.S.M.; Graham, D.W. Differential fate of erythromycin and beta-lactam resistance genes from swine lagoon waste under different aquatic conditions. *Environ. Pollut.* **2010**, *158*, 1506–1512.
8. Muyzer, G.; De Waal, E.C.; Uitterlinden, A.G. Profiling of complex microbial populations by denaturing gradient gel electrophoresis analysis of polymerase chain reaction-amplified genes coding for 16S rRNA. *Appl. Environ. Microbiol.* **1993**, *59*, 695–700.
9. Ghosh, S.; Ramsden, S.J.; LaPara, T.M. The role of anaerobic digestion in controlling the release of tetracycline resistance genes and class 1 integrons from municipal wastewater treatment plants. *Appl. Microbiol. Biot.* **2009**, *84*, 791–796.
10. Heuer, H.; Smalla, K. Manure and sulfadiazine synergistically increased bacterial antibiotic resistance in soil over at least two months. *Environ. Microbiol.* **2007**, *9*, 657–666.
